# Supplementary material
Source: PubMed Central journal article supplement (PMC4558269)

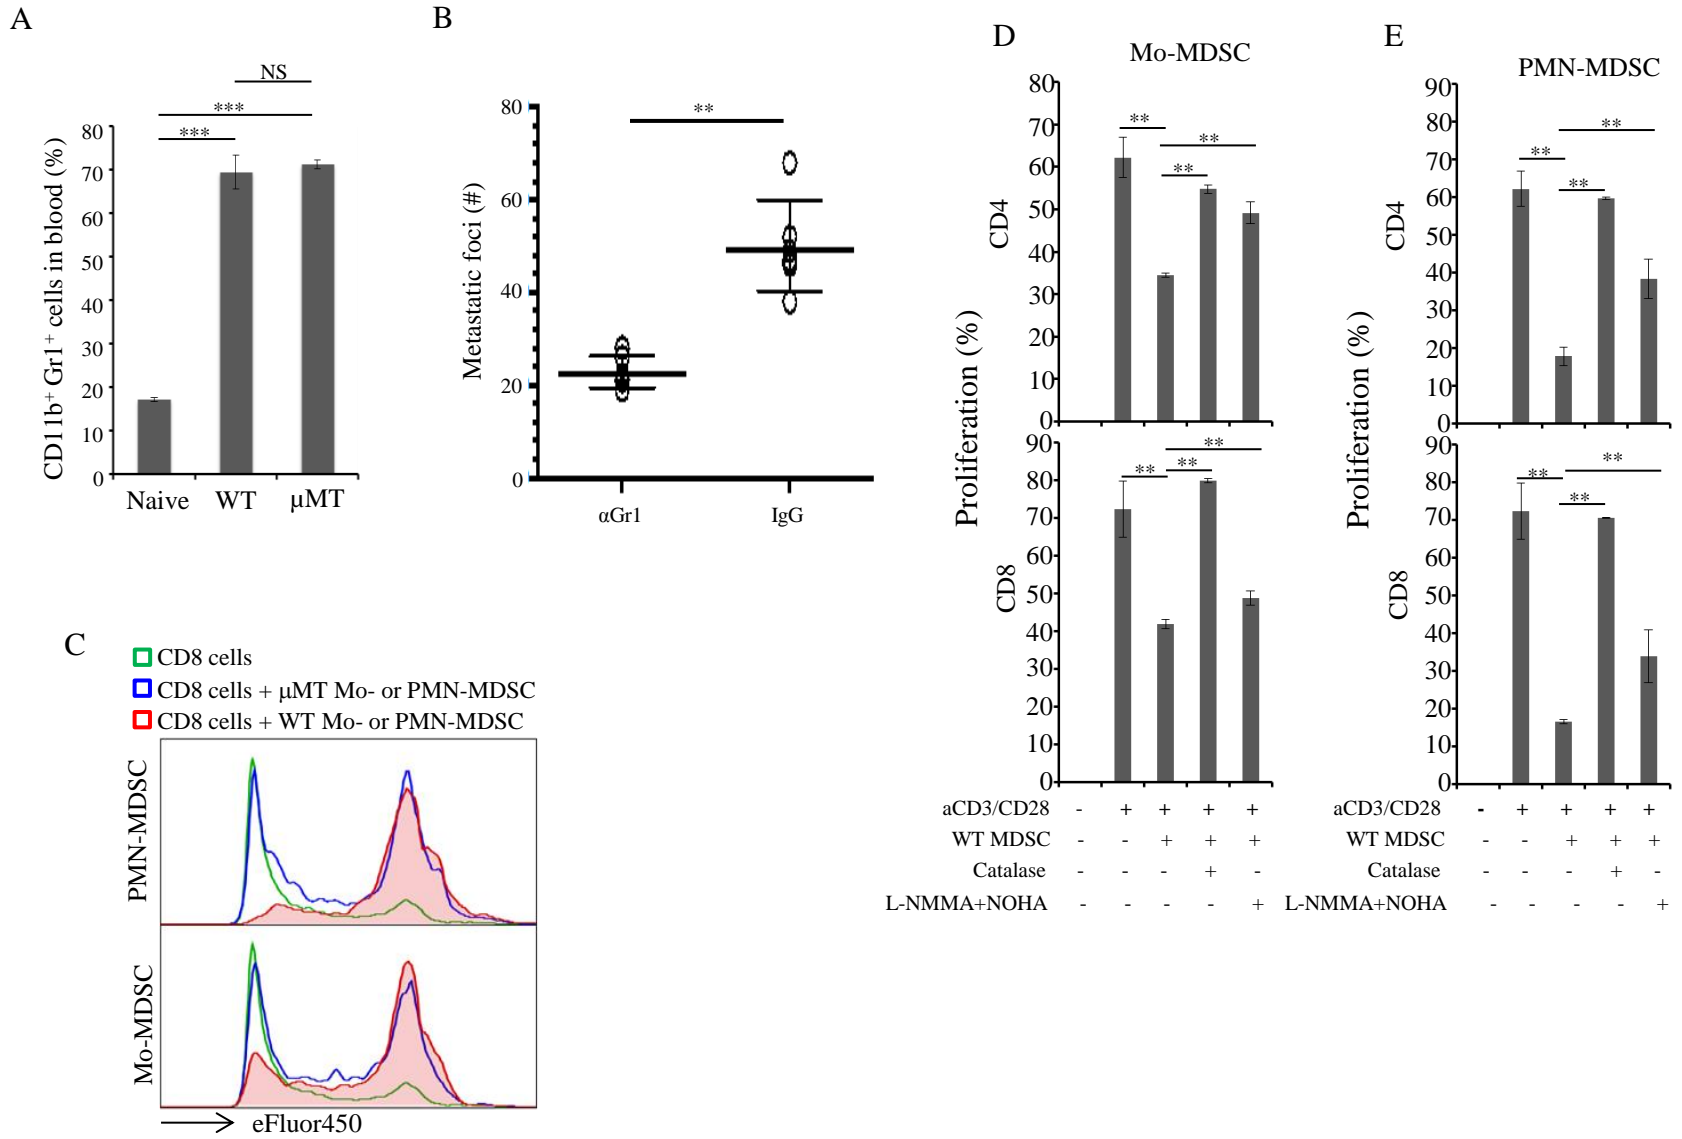

Supplement: NIHMS708309-supplement-1.pdf [file NIHMS708309-supplement-1.pdf]
